# Supplementary material for: Mapping genes governing flower architecture and pollen development in a double mutant population of carrot
Source: Front Plant Sci. 2014 Oct 8;5:504. doi: 10.3389/fpls.2014.00504 (PMC4189388; doi:10.3389/fpls.2014.00504)
Supplement: Supplementary file 1 [file DataSheet1.XLSX]

## Sheet: tested markers
Supplementary material: Table S1. Primer sequences and amplification conditions of all tested markers.
marker	marker type	reference	NCBI accession number	forward primer	reverse primer	annealing temperature	expected amplicon size	amplification	polymorphic	grouping	mapping
DCM-1	SSR	Niemann 2001 3)		GGGCCCTTCAAATGAATGAG	TCGCTGGAAACACGAAAACT	55	201	no
DCM-2	SSR	Niemann 2001		CGACGAATAAGATGCGAGAGA	CACTCTTGAGCCACCACCTATAC	55	191	yes	yes	yes	LG-9
DCM-3	SSR	Niemann 2001		CCCGTTATAAAATCGAGCCGC	AACTTGGGCAAGTGGTACAGTCG	55	243	yes	yes	no
DCM-4	SSR	Niemann 2001		TCAGCCCATATCCATTTTTGTG	CTTTGGCTTGCCTGCTCTCA	55	98	no
DCM-5	SSR	Niemann 2001		GGTGGTGTGCAGATGAGCTTT	GGTCCCTGTCTCTAATAATAGCCTG	55	247	yes	no
DCM-6	SSR	Niemann 2001		CTTGCAGCGCCACCATAAGG	GCCAGGGTTTTCCCAGTCAC	55	274	no
DCM-7	SSR	Niemann 2001		CCTCTCTTCTCTTTTCCTTCGTT	CGAGACTCCTGTTCTTTTCCACT	55	195	yes	no
DCM-8	SSR	Niemann 2001		GCCCATGTCTCTATTACTGTGTG	CCATATATTTAGCAACAGCCAAC	55	215	yes	no
DCM-9	SSR	Niemann 2001		CGGGATGGAACAAACAACT	GGTTGGTGATGGAGGT	60	260	yes	yes	yes	LG-9
DCM-10	SSR	Niemann 2001		GAGCTGGTGGAGATGGATTTCG	TAGACCAAAGGACCATGCGAC	60	219	yes	yes	yes
DCM-11	SSR	Niemann 2001		ACCAAAGACCAAGAACATAGG	TGCCAAAGAGAGATGCTAC	60	116	yes	no
DCM-12	SSR	Niemann 2001		ATGAAGCCGGAACCTATTT	CACTGTGGATGAAGTCCTCA	60	189	yes	no
DCM-13	SSR	Niemann 2001		AGCATCCACTATTGAGCGA	AGCTCGAAATTAACCCTCAC	60	329	no
DCM-14	SSR	Niemann 2001		GGTATGGTGATAGTAAAGTCAAT	AATGTTTACGGGTGTACTAGTT	60	251	no
DCM-15	SSR	Niemann 2001		ATCATCGATTCACACATCACAA	GTTCAATTTTGCGGATTCAG	55	155	yes	yes	no
DCM-16	SSR	Niemann 2001		TCTCTCGCGTCTCTCGATAAG	CGGGACCGAACAAATTTATT	60	146	no
DCM-17	SSR	Niemann 2001		GCCTTCACTGAAATACATAAAA	TACTGACAATTACTTCAGCATA	55	169	yes	yes	yes	no
DCM-18	SSR	Niemann 2001		TCTGCCTATAAATACCCATCCA	GGTAATCGCATCCACAATCTTA	55	175	yes	no
DCM-19	SSR	Niemann 2001		TGCTTGACCAGGTATATATGAT	ACACAGGTGCCACAAAAT	60	233	no
DCM-20	SSR	Niemann 2001		GCAGTGCTCATATTTCAAGAA	CCACTAAAGGGAACAAAAGG	60	197	no
DCM-21	SSR	Niemann 2001		CACTTCTACTGTACTTCAACCTC	AATGAAATGAAATTCCACG	60	206	yes	no
DCM-22	SSR	Niemann 2001		TTGCTGGATACAGTCTGTCA	ACAGAGACAGACGTACGGTT	60	118	yes	no
DCM-23	SSR	Niemann 2001		CTTCAAGCACAATATTTTTACA	TATTTACACCGGTCAAAAAG	55	167	yes	no
DCM-24	SSR	Niemann 2001		GAAAGTCATGAAAGCACAA	AATGTGTCTAACCAAAGGAT	55	278	yes	no
DCM-25	SSR	Niemann 2001		AAATATAATACATAAACACGAC	AAACAAGTCTTACAACATGA	55	180	no
DCM-26	SSR	Niemann 2001		CAACTGTTTGTGCAGGTGGTGT	TTTGCCCCTCTATTTTCTTCC	60	145	no
DCM-27	SSR	Niemann 2001		ACAATAATAGCAGCAGAGGGAC	GCTGTAATTGAATAGTCGGAAA	60	139	yes	no
DCM-28	SSR	Niemann 2001		ATTCCTGAAGGGTGGTAAGT	AATGCAGAACCGTATATGAGA	60	230	no
DCM-29	SSR	Niemann 2001		ACCTGTTCCCTGTCTTGTAATT	TATAGAGGGTGGATAAGGTCGT	55	164	no
DCM-30	SSR	Niemann 2001		GCACTCAGTATGATTCCCCACA	GTGTTGTGATGGATTGGAGACC	60	196	yes	no
DCM-31	SSR	Niemann 2001		AACCAGTATGAGCAAAGTA	ATAATATGAGATAGAGCGAGT	55	171	yes	no
DCM-32	SSR	Niemann 2001		TACTCCATGGTGGTAGTGAGG	AGAGAGGGAGAGCGGAAGA	60	195	yes	yes	yes	no
DCM-33	SSR	Niemann 2001		GCACATGGCATAATAATGA	TAAGAATTATTTATTCCACACAC	50	174	no
DCM-34	SSR	Niemann 2001		TTTTACACTAACCGGGGATG	AGTCAGGCTTCCAAGTGTTT	60	132	yes	yes	yes	LG-9
DCM-35	SSR	Niemann 2001		CTTTGCAATTTTGGGTTACA	ACGGAGATGGATACTTGGG	60	231	no
DCM-36	SSR	Niemann 2001		TTATTTCGATTCTCAGTCACTC	TAGAAGCGAAAGTTTGCC	55	215	yes	no
DCM-37	SSR	Niemann 2001		ATCACCAGCAATACAAGCAC	GGCTAGGATGCAGAAACTTA	60	172	yes	yes	yes	LG-9
gSSR3	SSR	Cavagnaro et al. 2011 4)	FJ816113	TTCTTCTTCATCTCTCCACAAGG1)	TAAAACAGTCACACATCTCTC	54	274	yes	yes	yes	no
gSSR4	SSR	Cavagnaro et al. 2011	FJ816114	CAATCTTGCCACTAAAAGAGCA1)	CAGATACAATAGACAGGAAACATCG	55	314	yes	yes	yes	LG-6
gSSR6	SSR	Cavagnaro et al. 2011	FJ816116	TCTCCTCTTGATTCTTCTTCGC1)	CCAATAAGCGTAAGCGTTTCTC	57	306	yes	yes	yes	LG-4
gSSR7	SSR	Cavagnaro et al. 2011	FJ816117	ACTAAAATGCTTGTTTCTAGGG1)	CAATTCAGCCATTGCATACG	57	155	yes	no
gSSR12	SSR	Cavagnaro et al. 2011	FJ816122	TGTATTGTGTGTATGCAATTTTGG1)	CAAATCACACAATGCATGAGAGA	54	222	yes	yes	yes	LG-7
gSSR14	SSR	Cavagnaro et al. 2011	FJ816124	CCACCTTGGACAAAGCAAAC1)	GCCCAGTTCTTCTTAATTGCAG	55	224	yes	yes	yes	LG-1
gSSR16	SSR	Cavagnaro et al. 2011	FJ816126	ATGCAAACGACAATATCCACAG1)	GCCCAGCCACTTCCTAGAT	57	212	yes	yes	yes	LG-9
gSSR17	SSR	Cavagnaro et al. 2011	FJ816127	GGTCTCTTCCACACTCATGGAT1)	CCAGCATTCACTATGTCCACTC	54	216	yes	no
gSSR19	SSR	Cavagnaro et al. 2011	FJ816129	CCGAGTTGGATTCGGAGAG1)	GTAAATTGAGGATTGCGAGTTG	54	231	yes	yes	yes	LG-5
gSSR31	SSR	Cavagnaro et al. 2011	FJ816141	GGATTCTAACTGGCCTCAAACA1)	TGTATATTTCCGCAACAAAGGC	54	381	yes	no
gSSR32	SSR	Cavagnaro et al. 2011	FJ816142	TGCAGGTGAAAATCGAACAG1)	CAAACAAACCCCCGATTTATAC	55	218	yes	yes	no
gSSR35	SSR	Cavagnaro et al. 2011	FJ816145	AATTCACAATCACCGACTCTCC1)	ACGTCAAAGCTCCTGTTCATTT	55	173	yes	yes	yes	LG-8
gSSR36	SSR	Cavagnaro et al. 2011	FJ816146	CCAGAAACTGATTTTTAATTTAGGC1)	CGTTTTTCAATAAAACCTCAATC	55	185	no
gSSR39	SSR	Cavagnaro et al. 2011	FJ816149	CGACTTGGCTTGTCTCTTCA1)	CTCCAATTTGAGATACATTTGGG	55	174	no
gSSR42	SSR	Cavagnaro et al. 2011	FJ816151	CAGCACTACTCGAAGATTGGC1)	ACCTAGTTCTGTCCAAAGTGCG	58	288	yes	yes	yes	LG-2
gSSR46	SSR	Cavagnaro et al. 2011	FJ816155	GATTACTTGACCTGGGTTGAGG1)	GTATGTGAAGCGGAGATTGTTG	58	380	yes	no
gSSR54	SSR	Cavagnaro et al. 2011	FJ816163	TGCATCTCTTTCCTTGGGAG1)	TGCCTTCTTCTGGTCAAGTG	54	323	yes	no
gSSR63	SSR	Cavagnaro et al. 2011	FJ816172	ACACTTTTCATCCTCCAACTCC1)	TGCGACCATGACTATACGAAAC	54	336	yes	yes	yes	LG-3
gSSR65	SSR	Cavagnaro et al. 2011	FJ816174	ACTGCAAAACAGAAACCCAGA1)2)	TAGGTCATGGCGATTGATGTAG	57	384	yes	no
gSSR66	SSR	Cavagnaro et al. 2011	FJ816175	CCTTGCTCGGATATGTATAGAATAG1)2)	CCACACAGACTTAACTTCATGC	57	200	yes	no
gSSR82	SSR	Cavagnaro et al. 2011	FJ816191	TCGATTATTTGTTGTTAATTGGG1)	CCATACTCTGCGGTATCCA	58	331	yes	no
gSSR85	SSR	Cavagnaro et al. 2011	FJ816194	TGACTCGGTGGATGAATTAAGA1)	CACTGCTTTGCCATTGTTTT	58	227	yes	yes	yes	LG-7
gSSR88	SSR	Cavagnaro et al. 2011	FJ816195	TATTAACGTCGCATTGAGCG1)	GGGATCGGATCAACAATGAC	58	266	yes	yes	yes	LG-9
gSSR90	SSR	Cavagnaro et al. 2011	FJ816199	GGAAATATTGAATAGAGCATTTACTG1)	GCAAAAAGTCCGACCCTGT	55	235	no
gSSR91	SSR	Cavagnaro et al. 2011	FJ816200	ATTCACCTTCAGTGCCTCCTAA1)	GAATTGTGTGTGGTGCCTTCTA	55	244	yes	yes	yes	LG-3
gSSR92	SSR	Cavagnaro et al. 2011	FJ816201	AGAAGGCATCGTGTGTTCATAA1)	CAACGGTGATTAAGTGGGTTCT	55	276	yes	yes	yes	LG-4
gSSR94	SSR	Cavagnaro et al. 2011	FJ816203	CAAAGCACCCTTGGTATAAGTG	TATGTCTGGATGCCGATTTT	55	290	yes	no
gSSR96	SSR	Cavagnaro et al. 2011	FJ816205	AGCGTCGTTTTCGCGAGT1)	CGCGGTTAAAGCAAAGCTAAT	55	334	yes	no
GSSR101	SSR	Cavagnaro et al. 2011	FJ816210	TGGGGTGGTTTTGTCGTATT1)	CGGGTAGGCTTAATGTTCTGT	54	328	no
gSSR104	SSR	Cavagnaro et al. 2011	FJ816213	TGGTTCTGAGGAAGATGTTTGA1)	GCCTGCACTAAATTGATGACAC	54	330	yes	no
gSSR107	SSR	Cavagnaro et al. 2011	FJ816216	TTCTGGTCTTTTGACATGAAGG1)	CGGATTTGAGGTGAGTTGAATA	54	265	yes	yes	yes	LG-8
gSSR111	SSR	Cavagnaro et al. 2011	FJ816220	GAGGAAGGGTAGATCCAGTCA1)	ATGGGATGTCTTTCCCCTCTAT	55	355	yes	no
gSSR112	SSR	Cavagnaro et al. 2011	FJ816221	TCTTGTYYAAGAAMACCACA1)2)	GTCCACACCAAGTATGCTC	55	137	yes	no
gSSR119	SSR	Cavagnaro et al. 2011	FJ816228	GCTAAAACCCTCAAATCTCTGC1)	GCTAAAACCCTCAAATCTCTGC	55	355	yes	no
gSSR122	SSR	Cavagnaro et al. 2011	FJ816231	TCGACATGAAATCAACCTCAG1)	TGTTCGATCGAGAGAGAGAG	55	265	yes	no
gSSR124	SSR	Cavagnaro et al. 2011	FJ816233	ACAAGCACCGACCCTTACTATC1)	AATTTAGTTGAAGCGCCCC	55	349	yes	no
gSSR138	SSR	Cavagnaro et al. 2011	FJ816246	CGCTCGAGTTTCGTAGAGT1)	CCTCCCCAACTCAATCCAAT	56	519	yes	yes	yes	LG-1
gSSR140	SSR	Cavagnaro et al. 2011	FJ816248	GGATACGAAGGAAAGACTCCAC1)	AGGAGAGTAAAAGATTGAGGACTTG	56	158	yes	no
gSSR148	SSR	Cavagnaro et al. 2011	FJ816256	CACACAACGATGCAAAAAGC1)2)	ACTTTAACGTTTGGGTAATGAAATAG	55	207	yes	yes	no
gSSR149	SSR	Cavagnaro et al. 2011	FJ816257	TGAAGCAACTCGTGATACAGAGA1)	TTCTCTTGTCCTGGTTAGCTC	57	342	yes	yes	yes	LG-6
gSSR154	SSR	Cavagnaro et al. 2011	FJ816262	CTTATATGTGATGGCGTCGAAA1)29	GACTGCACCGCTCCTAACTC	56	328	yes	no
bSSR21	SSR	Cavagnaro et al. 2011	FJ147926	TATGGATCTTGAAAACCGTAATTAGA1)	TGCCTCAATCAAGACACAATTTAT	51	259	yes	no
bSSR22	SSR	Cavagnaro et al. 2011	FJ147928	GGTGTTCTCAGTATCCTCATAATAAA1)2)	AAAGAAAAGGCAAGATTCATG	51	175	yes	no
bSSR43	SSR	Cavagnaro et al. 2011	FJ148130	CTTCTGATGCAAGTAACAACCCTAGT1)	AGTAATAGCTGGGCAAATGCTACAA	56	225	yes	no
bSSR54	SSR	Cavagnaro et al. 2011	FJ148271	CGTCACCAGAACATTCGAGAGAT1)	TACCAGAGATCAGATGGAATGTAGGT	56	189	no
bSSR76	SSR	Cavagnaro et al. 2011	FJ148203	GGAGAGAAAAAGCCAGCAGAGAA1)	ATA TCA GGG TGG ACT TGC TTC AAC	56	209	no
bSSR94	SSR	Cavagnaro et al. 2011	FJ149692	TTTTCAGTCACCTATAGCCACAAAG1)	ATCCATTCGTGTTGTGATGGTAATA	54	219	no
bSSR99	SSR	Cavagnaro et al. 2011	FJ147926	ATTGTTGGTTATTGGTTTGAATGAG1)	CAAGAGGGTTCAAGAATATGAAGAA	52	204	yes	no
bSSR125	SSR	Cavagnaro et al. 2011	FJ149571	GTTACTCCAGCCTCCAGAAAACTATC1)	AGTGAAGAAAGAAGAATCACATTGCT	56	183	yes	yes	yes	LG-1
eSSR36	SSR	Iorizzo et al. 2011 5)		CTCAGGCGGTTCAGAGTAGG1)	TTGAGGAGGCTAGCCAAGAA	57	167	yes	no
eSSR67	SSR	Iorizzo et al. 2011		TCACTTCAAGAACCCAAGGC1)	TCACTTCAAGAACCCAAGGC	55	292	yes	yes	no
eSSR98	SSR	Iorizzo et al. 2011		AACCGCAGTTTTCTTCATGG1)	CTGATTTCTGGGCAACAACA	54	299	no
N6W93	SSR	Cavagnaro et al. 2009 6)		ATAATAGGGCGTTTCTTGTTCTT	CGGGTAGGCTTAATGTTCTGT	50	290	yes	yes	yes	LG-9
PSY2	EST	Cavagnaro et al. 2009	DQ192186	GATGAATTGGTAGATGGACCTAATGCGTC	CCATCCTCATCCCTTCAACC	50	650	no
CHXB1	EST	Cavagnaro et al. 2009	DQ192193	TAGGGTGGCGAAATTCCGTATTCG	CCAAAACAGAGACCTGGAAAATAGCC	50	850	yes	no
LCYE	EST	Cavagnaro et al. 2009	DQ192192	AAGAAAGGAAACGCCAGAGAGC	ACCAAGAAATCCCTGCCACATC	50	380	no
CRTISO	EST	Cavagnaro et al. 2009	DQ192188	TGAGTAGGAGAAAGAGAAGCC	GCAACCAAACCACCAATCCC	50	190	no
ZDS1	EST	Cavagnaro et al. 2009	DQ222430	GGTTTATTGACTGTGATAACATGAGTGCTC	ATTTTTTGTTAGTTCCTTCAACTAAATTAACAGGTAAG	50	420	yes	no
ZDS2	EST	Cavagnaro et al. 2009	DQ192189	GCTCAGCTCCTATACAATTTG	TCTCTGGATACTCTTGCGTGTG	50	1050	no
NCDE2	EST	Cavagnaro et al. 2009	DQ192201	GGTGGATCACCAGTGGTGTATGAC	GCATTAACGATCTGAAGCTCCGAC	50	580	no
CHXE	EST	Cavagnaro et al. 2009	DQ192196	CAGAGCCGGTGGTCTCGTGGCCAGCAAC	AAGAAGATTGTGGACACTGAAGGTGAA	50	350	yes	no
Rs	EST	Cavagnaro et al. 2009	AY368232-AY368234	TGAATGCGGAGCCGCCGGCTAATT	TAAATGGTACCATCCTTGTTAGAAT	50	1300	no
DCG321	SCAR	Cavagnaro et al. 2009	EU664593	GTTTTCAGTCTGAAACTCTTTTCC	TCTAAAACTAGCCACCCTTTTTCTC	50	1000	yes	no
Y2Mark	SCAR	Cavagnaro et al. 2009		TAAAGTCGTATAGGAAGAACAT	TGGATCATCAGAACTCAACT	50	300	yes	yes	yes	LG-7
Q1/800	SCAR	Cavagnaro et al. 2009		GGACGATGGCCAGGGAAAGC	AACCAAGTCACGCCAACAGTAAAT	50	700	yes	yes	yes	LG-8
DcOR	EST	Cavagnaro et al. 2009		GAGATGCAAATACTGTCTAGGAACTG	GTACAGACAAGTAGGGCACA	50	340	yes	yes	yes	LG-3
DcARF	EST	Kiyosue and Shinizaki 1995 7)	D45420	GATGGTTGGTCTTGATGCGCTGG	GTTTAAAGACAGTGGTGGCGACCC	58	1480	yes	no
DcTUB	EST	Hirner et al. 2001 8)	AY007250	GTGCATTTGAGCCCTCTTATGATG	CATAGAGAACAGCATAAAGAGTTGTTGC	58	1250	yes	no
DcAGO1	EST	Takahata 2008 9)	AB360853	GAGCTTGATGCAATTCGCAAGGCATG	CACCCTCTTCACATTCTCTTTCAATGC	60	2100	no
DcCIT-synthase	EST	Takita et al. 1999 10)	AB017159	CCTGGATATGGACATGGTGTTCTGC	GATACCTCAAACTATGCATGTCCCC	53	3200	yes	no
DcLFY	EST	Szklarzyk and Linke, unpublished		CAGGTACGCGAAGAAAGCAGG	GGCAAAGCTGGCGGAGCTTGG	53	520	yes	no
DcELF1α	EST	Kawahara et al. 1992 11)	D12709	GATCCCGCCAAAGAGGCTGCC	CCACCGCCTGTCAAGCACCC	65	830	yes	yes	yes	LG-4
DcMADS1, TaqI 2)	CAPS	Linke et al. 2003 12)	AJ271147	CTCTTATGCCGAGAGGCAG	GAGCAGTGTCAAGCTGCTG	53	298	yes	yes	yes	no
DcMADS2, HinfI 2)	CAPS	Linke et al. 2003	AJ271148	GGATCGGTATCACCAGCAC	CTCCTCCTCCAGACGTTGCCC	54	950	yes	yes	no
DcMADS3	EST	Linke et al. 2003	AJ271149	GTGTGATGCTAAGGTTTCG	GATCCTGCTCCGCCATG	54	460	yes	yes	yes	LG-5
DcMADS4	EST	Linke et al. 2003	AJ271150	GCTGCAAGGGTGCGCCAGC	CCCAGATGCACCTGG	50	1400	yes	no
DcMADS5, AluI 2)	CAPS	Linke et al. 2003	AJ271151	GGGCACAAAGGAGCTTGAGG	AGAGCATCCACCCTGGAATG	50	605/770	yes	yes	yes	LG-7
DcAOX2a	EST	Cardoso et al. 2009 13)	EU286575	TGCTGCATCTGAGGTCTCTCC	CCAATCAATTCTACACAACAACC	55	1900	yes	yes	yes	LG-6
DcAOX2b	EST	Campos et al. 200914)	EU286576	TGCATGCGTCCTTCCTTATTTTTC	AGCTTTGGTGACAGTATGTATAGG	55	1400	yes	yes	yes	LG-9
DcCHS2	EST	Grzebelus, unpublisged results	D16255.1	CTCAAGGAGAAGTTTAGGCGGATG	ATGAGGCCATGTACTCGCAGAAAC	56	850/900	yes	yes	yes	LG-9
1) Forward primer elongated at 5' end by M13 sequence CACGACGTTGTAAAACGAC
2) Polymorphic markers were obtained after cleavage of the amplification products by a given restriction enzyme
3) Niemann M (2001) Entwicklung von Mikrosatelliten Markern bei der Möhre (Daucus carota L.) und die Markierung eines Alternaria-Resistenzgens. Dissertation, University Hannover. Shaker Verlag, Aachen
4) Cavagnaro PF, Chung SM, Manin S, Yildiz M, Ali A, Alessandro MS, Iorizzo M, Senalik DA, Simon PW (2011) Microsatellite isolation and marker development in carrot – genomic distribution, linkage mapping, genetic diversity analysis and marker transferability across Apiaceae. BMC Genomics 12:386.
5) Iorizzo M, Senalik DA, Grzebelus D, Bowman M, Cavagnaro PF, Matvienko M, Asrafi H, van Deynze A, Simon PW (2011) De novo assembly and characterization of the carrot transcriptome reveals novel genes, new markers, and genetic diversity. BMC Genomics 12:389.
6) Cavagnaro PF, Chung SM, Szklarczyk M, Grzebelus D, Senalik D, Atkins AE, Simon PW (2009) Characterization of a deep-coverage carrot (Daucus carota L.) BAC library and initial analysis of BAC-end sequences. Mol Genet Genomics 281:273-288.
7) Kiyosue T, Shinozaki K (1995) Cloning of a carrot cDNA for a member of the family of ADP-ribosylation factors (ARFs) and characterization of the binding of nucleotides by its product after expression in E. coli. Plant Cell Physiol 36:849-856.
8) Hirner AA, Veit S, Seitz HU (2001) Regulation of anthocyanin biosynthesis in UV-A irradiated cell cultures of carrot and in organs of intact carrot plants. Plants Sci 161:315-322.
9) Takahata K (2008) Isolation of carrot Argonaute 1 from substractive somatic embryogenesis cDNA library. Biosci Biotechnol Biochem 72:900-904.
10) Takita E, Koyama H, Shirano D, Shibata D, Hara T (1999) Structure and expression of the mitochondrial citrate synthase gene in carrot cells utilizing Al-phosphate. Soil Sci Plant Nutr 45:197-205.
11) Kawahara R, Sunabori S, Fukuda H, Komamime A (1992) A gene expressed preferentially in the globular stage of somatic embryogenesis encodes elongation factor 1 alpha in carrot. Eur. J. Biochem. 209, 157-162.
12) Linke B, Nothnagel T, Börner T (2003) Flower development in carrot CMS plants: mitochondria affect the expression of MADS box genes homologous to GLOBOSA and DEFICIENS. Plant J 34:27-37.
13)Cardoso, H. G., Campos, M. D., Costa, J. H., Campos, M. C., Nothnagel, T., and Arnholdt-Schmitt, B. (2009). Carrot alternative oxidase gene AOX2a demonstrates allelic and genotypic polymorphisms in intron 3. Physiol. Plantarum 137, 592-608.
14)Campos, M. D., Cardoso, H. G., Linke, B., Costa, J. H., de Melo, D. F., Justo, L., Frederico, A. M., and Arnholdt-Schmitt, B. (2009). Differential expression and co-regulation of carrot AOX genes (Daucus carota). Physiol. Plantarum 137, 578-591.
